# Supplementary material for: Distance Effect of Ni-Pt Dual Sites for Active Hydrogen Transfer in Tandem Reaction
Source: PubMed Central journal article supplement — Innovation (Camb). 2020 Aug 3;1(2):100029. doi: 10.1016/j.xinn.2020.100029 (PMC8454767; doi:10.1016/j.xinn.2020.100029), 2020-08-03
Supplement: mmc2.pdf [file mmc2.pdf]

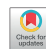

# Distance Effect of Ni-Pt Dual Sites for Active Hydrogen Transfer in Tandem Reaction

Huibin Wu,<sup>1,2</sup> Bin Zhang,<sup>1,2,\*</sup> Haojie Liang,<sup>1,2</sup> Liming Zhai,<sup>1,2</sup> Guofu Wang,<sup>1</sup> and Yong Qin<sup>1,2,\*</sup>

<sup>1</sup>State Key Laboratory of Coal Conversion, Institute of Coal Chemistry, Chinese Academy of Sciences, Taiyuan 030001, PR China

<sup>2</sup>Center of Materials Science and Optoelectronics Engineering, University of Chinese Academy of Sciences, Beijing 100049, China

\*Correspondence: [zhangbin2009@sxicc.ac.cn](mailto:zhangbin2009@sxicc.ac.cn) (B.Z.); [qinyong@sxicc.ac.cn](mailto:qinyong@sxicc.ac.cn) (Y.Q.)

Received: April 24, 2020; Accepted: July 26, 2020; Published: August 28, 2020; <https://doi.org/10.1016/j.xinn.2020.100029>

© 2020 The Author(s). This is an open access article under the CC BY-NC-ND license (<http://creativecommons.org/licenses/by-nc-nd/4.0/>)

## PUBLIC SUMMARY

- The distance effect is an interesting and important topic in catalysis
- The distance of Ni-Pt dual sites is precisely controlled in subnanometer scale on a TiO<sub>2</sub>/Pt/TiO<sub>2</sub>/Ni/TiO<sub>2</sub> five-layer catalyst by ALD
- The distance controls the water-assisted hydrogen transfer, determining the overall efficiency of the tandem reaction
- A close distance in subnanometer induces more active sites for hydrogen transfer and efficient synergy of Ni and Pt sites

## CORRESPONDENCE

[zhangbin2009@sxicc.ac.cn](mailto:zhangbin2009@sxicc.ac.cn) (B.Z.); [qinyong@sxicc.ac.cn](mailto:qinyong@sxicc.ac.cn) (Y.Q.)

<https://doi.org/10.1016/j.xinn.2020.100029>

Received: April 24, 2020  
Accepted: July 26, 2020  
Published: August 28, 2020

[www.cell.com/the-innovation](http://www.cell.com/the-innovation)

## GRAPHICAL ABSTRACT

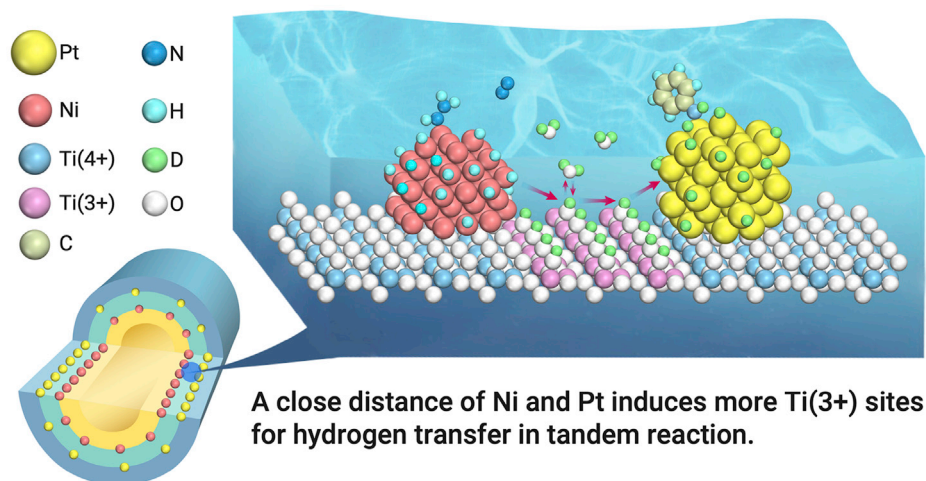

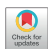

# Distance Effect of Ni-Pt Dual Sites for Active Hydrogen Transfer in Tandem Reaction

Huibin Wu,<sup>1,2</sup> Bin Zhang,<sup>1,2,\*</sup> Haojie Liang,<sup>1,2</sup> Liming Zhai,<sup>1,2</sup> Guofu Wang,<sup>1</sup> and Yong Qin<sup>1,2,\*</sup>

<sup>1</sup>State Key Laboratory of Coal Conversion, Institute of Coal Chemistry, Chinese Academy of Sciences, Taiyuan 030001, PR China

<sup>2</sup>Center of Materials Science and Optoelectronics Engineering, University of Chinese Academy of Sciences, Beijing 100049, China

\*Correspondence: zhangbin2009@sxicc.ac.cn (B.Z.); qinyong@sxicc.ac.cn (Y.Q.)

Received: April 24, 2020; Accepted: July 26, 2020; Published: August 28, 2020; <https://doi.org/10.1016/j.xinn.2020.100029>

© 2020 The Author(s). This is an open access article under the CC BY-NC-ND license (<http://creativecommons.org/licenses/by-nc-nd/4.0/>).

Unveiling the distance effect between different sites in multifunctional catalysts remains a major challenge. Herein, we investigate the distance effect by constructing a dual-site distance-controlled tandem catalyst with a five-layered TiO<sub>2</sub>/Pt/TiO<sub>2</sub>/Ni/TiO<sub>2</sub> tubular nanostructure by template-assisted atomic layer deposition. In this catalyst, the Ni and Pt sites are separated by a porous TiO<sub>2</sub> interlayer, and the distance between them can be precisely controlled on the subnanometer scale by altering the thickness of the interlayer, while the inner and outer porous TiO<sub>2</sub> layers are designed for structural stability. The catalyst exhibits superior performance for the tandem hydrazine hydrate decomposition to hydrogen and subsequent nitrobenzene hydrogenation when the Ni and Pt site distance is on the subnanometer level. The performance increases with the decrease of the distance and is better than the catalyst without the TiO<sub>2</sub> interlayer. Isotopic and kinetic experiments reveal that the distance effect controls the transfer of active hydrogen, which is the rate-determining step of the tandem reaction in a water solvent. Reduced Ti species with oxygen vacancies on the TiO<sub>2</sub> interlayer provide the active sites for hydrogen transfer with -Ti-OH surface intermediates via the continuous chemisorption/desorption of water. A smaller distance induces the generation of more active sites for hydrogen transfer and thus higher efficiency in the synergy of Ni and Pt sites. Our work provides new insight for the distance effect of different active sites and the mechanism of intermediate transfer in tandem reactions.

**KEYWORDS:** DISTANCE EFFECT; DUAL SITES; HYDROGEN TRANSFER; INTERLAYER; TANDEM CATALYST

## INTRODUCTION

"One-pot" tandem catalysis, in which multiple catalysts and reagents are combined in a single reactor for precisely staged catalytic steps, can reduce energy loss, waste, and time, resulting in economic and environmental benefits in the synthesis of chemicals.<sup>1</sup> It is highly desirable to design highly efficient multifunctional heterogeneous catalysts for tandem catalysis.<sup>2–4</sup> In a tandem catalyst, multiple functional sites are combined to accommodate the same reaction conditions and realize the couple of individual reactions with high efficiency in the transfer of active intermediates between functional sites. Currently, it is still challenging to determine the distance effect on the transfer mechanism of intermediates due to the limitations in precisely controlling the distance between different active sites at the subnanoscale by traditional methods.

Spatial isolation of complementary functional sites with an appropriate distance affords control over the reaction sequence and paths in tandem catalysis. For example, in a mixture of zeolite Y and alumina binder, the selectivity in cracking large hydrocarbons for high-quality diesel production is optimized when Pt nanoparticles are located on the binder with nanoscale separation rather than directly on zeolite Y with no separation.<sup>5</sup> In some cases, intermediates without enough stability may be transformed into new useful products by quickly entering a subsequent catalytic cycle before decomposition.<sup>2</sup> For example, the highly selective formation of olefins from syngas is enabled by a physical mixture of ZnCrO<sub>x</sub> and MSAPO zeolite through the generation of a C\* (CH<sub>2</sub>CO) intermediate on ZnCrO<sub>x</sub> followed by the intermediate

transfer and transformation in zeolite to olefins.<sup>6</sup> Similar coupling approaches of oxides (or metal) and zeolites were utilized in CO<sub>2</sub> hydrogenation to liquid fuels<sup>7</sup> or olefins<sup>8</sup> and syngas to isoparaffin,<sup>9</sup> dimethyl ether,<sup>10</sup> or aromatics.<sup>11,12</sup> Although the isolation of different active sites and distance play a key role in a high-efficiency tandem catalyst, the transfer of intermediates and the distance effect are not clear due to the limited methodologies in distance control between functional sites in a tandem catalyst.

Atomic layer deposition (ALD) is a high-level film growth technology that relies on two sequential self-limiting surface reactions.<sup>13,14</sup> The unique self-limiting character makes ALD capable of constructing nanomaterials with high conformity, good spatial uniformity, and atomic thickness control of films.<sup>15,16</sup> In recent decades, advanced catalysts were synthesized by precisely controlling the size, interface, and pore structures via ALD at the atomic and molecular levels.<sup>17–24</sup> Moreover, ALD strategies have been developed to design and synthesize well-defined catalysts with complex functional structures, such as confined catalysts,<sup>25–27</sup> sandwich catalysts,<sup>28</sup> catalysts with spatially separated metal structures,<sup>29,30</sup> tube-in-tube catalysts,<sup>31</sup> and encapsulated catalysts.<sup>21</sup> The confinement effect, the function of the metal-oxide interface, and the synergy effect have been well investigated and revealed in these catalytic systems.

Herein, the distance effect is investigated by developing a well-defined tubular five-layer tandem catalyst (TiO<sub>2</sub>/Pt/TiO<sub>2</sub>/Ni/TiO<sub>2</sub>) via template-assisted ALD to precisely tailor the distance between the metal sites on the subnanometer scale (Scheme 1). Pt and Ni nanoparticle layers were embedded in and separated by a porous titanium oxide layer. The distance between the Ni and Pt layers can be precisely controlled by altering the ALD cycle number of the TiO<sub>2</sub> interlayer. The distance effect and function of the interlayer on hydrogen transfer were evaluated using hydrazine hydrate (N<sub>2</sub>H<sub>4</sub>·H<sub>2</sub>O) decomposition to hydrogen and subsequent nitrobenzene hydrogenation as the probe tandem reaction. In particular, the Ni and Pt layers catalyze only hydrazine hydrate decomposition and nitrobenzene hydrogenation, respectively. Compared with TiO<sub>2</sub>/Pt/Ni/TiO<sub>2</sub> with no interlayer, tube-in-tube TiO<sub>2</sub>/Pt/Ni/TiO<sub>2</sub>, single-metal TiO<sub>2</sub>/Pt/TiO<sub>2</sub> and TiO<sub>2</sub>/Ni/TiO<sub>2</sub>, and a mixture of TiO<sub>2</sub>/Pt/TiO<sub>2</sub> and TiO<sub>2</sub>/Ni/TiO<sub>2</sub>, the TiO<sub>2</sub>/Pt/TiO<sub>2</sub>/Ni/TiO<sub>2</sub> five-layer catalyst exhibits higher activity in the tandem reaction. Moreover, the catalytic activity decreases with increasing interlayer thickness and is optimized over TiO<sub>2</sub>/Pt/10TiO<sub>2</sub>/Ni/TiO<sub>2</sub> (0.6 nm distance). The enhanced activity is ascribed to the enhancement of active hydrogen transfer between two metal layers. The water solvent participates in the key step of hydrogen transfer on the TiO<sub>2</sub> interlayer.

## RESULTS

### Synthesis and Characterization of the Distance-Controlled Dual-Site Tandem Catalyst

To investigate the distance effect of dual sites in the tandem reaction, we designed a five-layer catalyst with a TiO<sub>2</sub>/Pt/yTiO<sub>2</sub>/xNi/TiO<sub>2</sub> structure as an example. It was prepared by sequentially depositing an inner TiO<sub>2</sub> layer (300 cycles), NiO (x cycles, x = 300), a TiO<sub>2</sub> interlayer (y cycles, y = 0, 10, 20, 30, 50, and 100), Pt (20 cycles), and an outer TiO<sub>2</sub> layer (300 cycles) by the template-assisted ALD method using carbon nanofibers (CNFs) as templates, followed by calcination in air and reduction in H<sub>2</sub>/Ar. The inner and

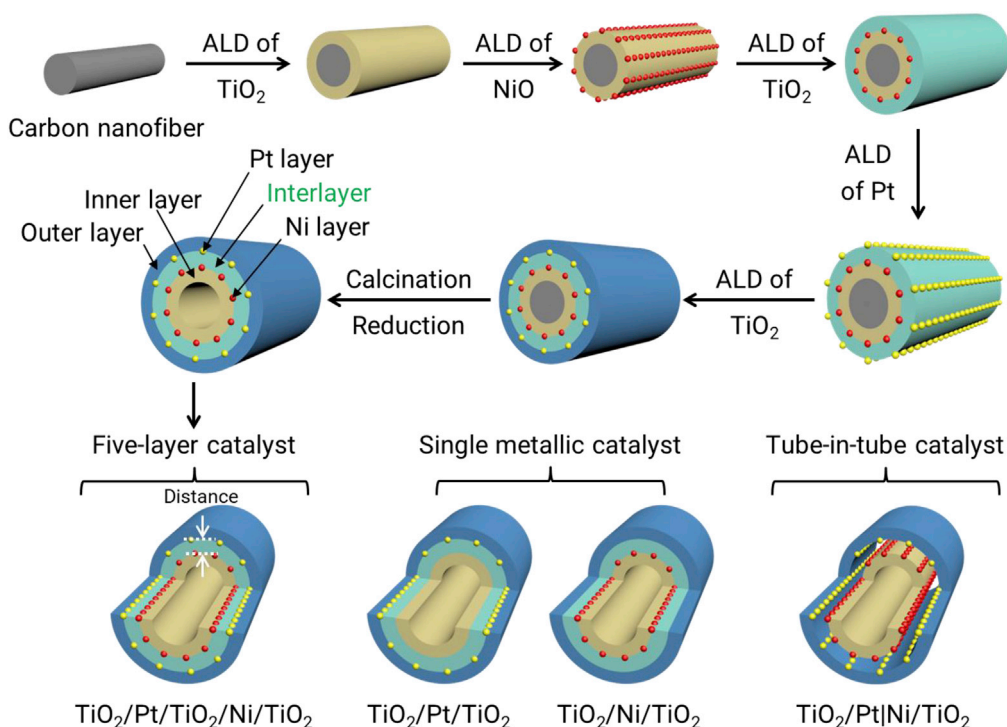

**Scheme 1. Schematic Illustration of the Synthesis Process of the  $\text{TiO}_2/\text{Pt}/\text{TiO}_2/\text{Ni}/\text{TiO}_2$  Distance-Controlled Dual-Site Tandem Catalyst by ALD.** For control experiments,  $\text{TiO}_2/\text{Ni}/\text{TiO}_2$  without a Pt layer and  $\text{TiO}_2/\text{Pt}/\text{TiO}_2$  without a Ni layer are prepared by omitting Pt ALD and Ni ALD, respectively. In addition, a  $\text{TiO}_2/\text{Pt}/\text{Ni}/\text{TiO}_2$  catalyst with a tube-in-tube structure is synthesized using polyimide as an interlayer followed by calcination in air and reduction in hydrogen.

outer  $\text{TiO}_2$  layers (with a fixed thickness) are used to maintain the structural stability of the catalyst, since the thickness of the  $\text{TiO}_2$  interlayer is limited, particularly for distance control at the subnanometer level. The  $\text{TiO}_2$  interlayer is used to separate the Ni and Pt sites. The distance between the Ni and Pt sites can be precisely controlled by changing the ALD cycle number ( $y$ ) of the  $\text{TiO}_2$  interlayer with an average growth rate of 0.06 nm/cycle. In addition, other catalysts were also synthesized by the same method for comparison. For instance,  $\text{TiO}_2/\text{Ni}/\text{TiO}_2$  without a Pt layer,  $\text{TiO}_2/\text{Pt}/\text{TiO}_2$  without a Ni layer, and  $\text{TiO}_2/\text{Pt}/\text{Ni}/\text{TiO}_2$  without a  $\text{TiO}_2$  interlayer were prepared by omitting the ALD process for the Pt, Ni, and  $\text{TiO}_2$  interlayers, respectively. In addition, a  $\text{TiO}_2/\text{Pt}/\text{Ni}/\text{TiO}_2$  catalyst with a tube-in-tube structure was prepared with polyimide as the interlayer followed by calcination in air and reduction in  $\text{H}_2/\text{Ar}$ , and the movable inner tube results in an undefined distance and possible instant contact between two metal sites.

As revealed by transmission electron microscopy (TEM) (Figures 1 and S1), all the catalysts show a similar sandwiched structure. A 3.0 nm  $\text{TiO}_2$  interlayer is observed for  $\text{TiO}_2/\text{Pt}/50\text{TiO}_2/\text{Ni}/\text{TiO}_2$  (Figures 1A and 1B), which is in accordance with the deposition rate of  $\text{TiO}_2$  (0.06 nm/cycle). However, the thickness of the  $\text{TiO}_2$  interlayer between Pt and Ni is too thin to be observed for  $\text{TiO}_2/\text{Pt}/10\text{TiO}_2/\text{Ni}/\text{TiO}_2$  and  $\text{TiO}_2/\text{Pt}/30\text{TiO}_2/\text{Ni}/\text{TiO}_2$ . The Pt particles (0.4 wt%, ICP-OES) and Ni particles (1.4 wt%, ICP-OES) are not clearly visible due to their low content, small particle size, and reduced contrast due to these  $\text{TiO}_2$  layers. Furthermore, a cross-sectional slice of  $\text{TiO}_2/\text{Pt}/10\text{TiO}_2/\text{Ni}/\text{TiO}_2$  along the direction perpendicular to the tube was prepared by focused ion beam milling. The cross-section of the five layers of  $\text{TiO}_2/\text{Pt}/10\text{TiO}_2/\text{Ni}/\text{TiO}_2$  is clearly observed in Figures 1C and 1D. The electronic structure of the  $\text{TiO}_2$  interlayer and the inner and outer layers on this slice was also characterized by electron energy loss spectroscopy (EELS) measurements (Figure 1E). Typically, the inner and outer  $\text{TiO}_2$  layers exhibit two similar  $L_2$  and  $L_3$  peaks of Ti (4+) species at 464.9 and 459.6 eV, while an obvious redshift (0.5 eV) of  $\text{Ti-L}_2$  and  $\text{Ti-L}_3$  peak of reduced Ti(3+) species are detected for the region at the  $\text{TiO}_2$  interlayer.<sup>32,33</sup> In addition, the high-angle annular dark-field scanning transmission electron microscopy (HAADF-STEM) and energy dispersive X-ray (EDX) spectrometry images of

$\text{TiO}_2/\text{Pt}/50\text{TiO}_2/\text{Ni}/\text{TiO}_2$  further indicate the distinguished five-layer structure and the homogeneous distribution of Ti, Ni, and Pt compositions (Figure 1F). These results confirm that the distance between the Ni and Pt dual sites can be precisely controlled depending on the designed five-layer catalyst structure.

The physicochemical properties of the catalysts were characterized by various technologies. First,  $\text{N}_2$  physical adsorption revealed that the pore structure is similar for  $\text{TiO}_2/\text{Pt}/y\text{TiO}_2/\text{Ni}/\text{TiO}_2$  ( $y = 10\text{--}100$ ) and  $\text{TiO}_2/\text{Pt}/\text{Ni}/\text{TiO}_2$  (Figure S2; Table S1). The surface area and average Barrett-Joyner-Halenda pore diameter are approximately 35–36  $\text{m}^2/\text{g}$  and 3.6–3.7 nm, respectively, for different samples (Table S1). Nanopores are formed during calcination due to the crystallization of  $\text{TiO}_2$ .<sup>28</sup> Second, the loading of Ni (1.39–1.41 wt%) and Pt (0.39–0.41 wt%) is also similar for  $\text{TiO}_2/\text{Pt}/y\text{TiO}_2/\text{Ni}/\text{TiO}_2$ ,  $\text{TiO}_2/\text{Pt}/\text{TiO}_2$ , and  $\text{TiO}_2/\text{Ni}/\text{TiO}_2$ . Third, only diffraction peaks of the anatase phase and no diffraction peaks of Pt and Ni are observed in the X-ray diffraction (XRD) patterns of different catalysts due to the low content and high dispersion of these two metals (Figure S3). Fourth, the number of surface-active sites for hydrogen adsorption measured by hydrogen pulse adsorption at 30 °C are also similar over different catalysts (Table S1). The similar pore structure, metal loadings, crystal structure, and the number of the active site for hydrogen adsorption are critically important for reliably revealing the distance effect and the functions of the interlayer.

X-ray absorption near edge structure (XANES) and extended X-ray absorption fine structure (EXAFS) spectroscopy were conducted to illustrate the electronic structure of Pt and Ni species. In the Ni K-edge XANES spectra, the white lines for  $\text{TiO}_2/\text{Pt}/y\text{TiO}_2/\text{Ni}/\text{TiO}_2$  and  $\text{TiO}_2/\text{Ni}/\text{TiO}_2$  are higher but rather similar to that of the Ni foil (Figure 2A), indicating the presence of both metallic Ni and Ni oxide species.<sup>34</sup> The edge features of the Pt  $L_3$ -edge for  $\text{TiO}_2/\text{Pt}/y\text{TiO}_2/\text{Ni}/\text{TiO}_2$ ,  $\text{TiO}_2/\text{Pt}/\text{Ni}/\text{TiO}_2$ , and  $\text{TiO}_2/\text{Pt}/\text{TiO}_2$  are similar to those of the Pt foil, indicating the dominant metallic Pt (Figure 2B). Fourier transform of EXAFS spectra in  $r$  space and corresponding fitting results are shown in Figures 2C and 2D and Tables S2 and S3. The Pt-Ni bond from the alloy is observed only for  $\text{TiO}_2/\text{Pt}/\text{Ni}/\text{TiO}_2$  without the  $\text{TiO}_2$  interlayer. Thus, reliable spatial isolation of the Ni and Pt layers is realized even by a

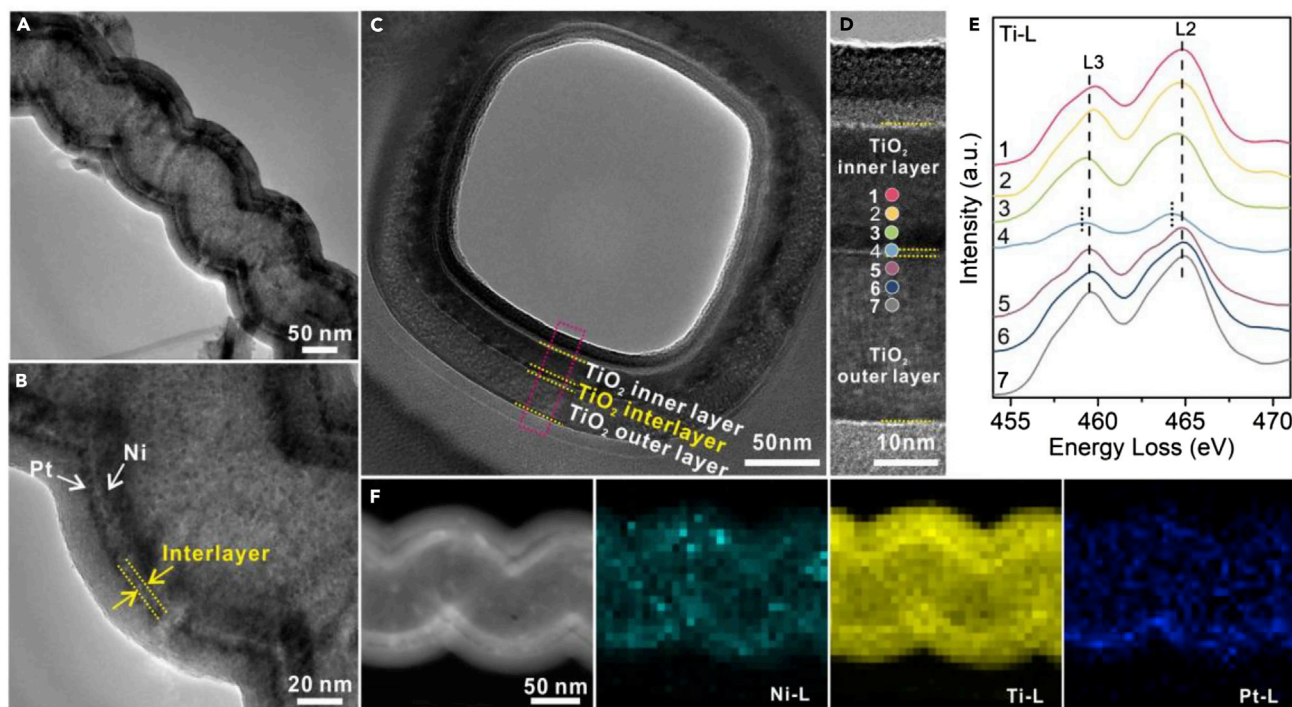

**Figure 1. Structural Characterization of the Catalyst.** (A and B) TEM images of  $\text{TiO}_2/\text{Pt}/50\text{TiO}_2/\text{Ni}/\text{TiO}_2$ . (C and D) TEM image of the cross-sectional slice of  $\text{TiO}_2/\text{Pt}/10\text{TiO}_2/\text{Ni}/\text{TiO}_2$  prepared by focused ion beam milling and the corresponding area for the EELS line scan. (E) Selected Ti-L-edge EELS spectra recorded at positions 1–7 in (D). (F) STEM image and STEM-EDX element mapping of the Ni-L, Ti-L, and Pt-L-edges of  $\text{TiO}_2/\text{Pt}/50\text{TiO}_2/\text{Ni}/\text{TiO}_2$ .

subnanometer-thick  $\text{TiO}_2$  interlayer for  $\text{TiO}_2/\text{Pt}/10\text{TiO}_2/\text{Ni}/\text{TiO}_2$ . Furthermore, the low coordination number of Ni and Pt species in the fitting results indicates the formation of small metallic Ni and Pt subnanoclusters,<sup>35</sup> and the coordination structure of the two metals is nearly unchanged with the thickness of the interlayer.

### Catalytic Performance and Distance Effect of the Dual-Site Tandem Catalyst

On the basis of a precisely designed catalyst structure, the distance effect between Pt and Ni layers has been investigated by applying tandem hydrogenation of nitrobenzene to aniline using  $\text{N}_2\text{H}_4 \cdot \text{H}_2\text{O}$  as a hydrogen source in water as a perfect model reaction, since the Ni layer can catalyze the decomposition of  $\text{N}_2\text{H}_4 \cdot \text{H}_2\text{O}$  to produce hydrogen,<sup>36</sup> while the Pt layer can catalyze nitrobenzene hydrogenation efficiently. The different functions of the Ni and Pt layers have been clearly confirmed for the two single reactions by control experiments (Figure S4). In the tandem reaction, the  $\text{TiO}_2/\text{Pt}/10\text{TiO}_2/\text{Ni}/\text{TiO}_2$  catalyst exhibits remarkably higher activity ( $24.8 \text{ mmol g}_{\text{Cat.}}^{-1} \text{ h}^{-1}$ ) than other catalysts with different structures, including  $\text{TiO}_2/\text{Pt}/\text{TiO}_2$  ( $2.4 \text{ mmol g}_{\text{Cat.}}^{-1} \text{ h}^{-1}$ ) and  $\text{TiO}_2/\text{Ni}/\text{TiO}_2$  ( $2.5 \text{ mmol g}_{\text{Cat.}}^{-1} \text{ h}^{-1}$ ) with one metal layer,  $\text{TiO}_2/\text{Pt}/\text{Ni}/\text{TiO}_2$  without an interlayer ( $16.3 \text{ mmol g}_{\text{Cat.}}^{-1} \text{ h}^{-1}$ ), a physical mixture of  $\text{TiO}_2/\text{Pt}/\text{TiO}_2$  and  $\text{TiO}_2/\text{Ni}/\text{TiO}_2$  ( $5.8 \text{ mmol g}_{\text{Cat.}}^{-1} \text{ h}^{-1}$ ), and  $\text{TiO}_2/\text{Pt}|\text{Ni}/\text{TiO}_2$  with a tube-in-tube structure ( $9.3 \text{ mmol g}_{\text{Cat.}}^{-1} \text{ h}^{-1}$ ) (Figures 3A and S5). This indicates the advantages of the spatially isolated Pt and Ni layers with an ultrathin  $\text{TiO}_2$  interlayer. We calculated the  $\text{H}_2$  consumption rate ( $74.3 \text{ mmol g}_{\text{Cat.}}^{-1} \text{ h}^{-1}$ ) in the tandem catalysis reaction, which is more than 100 times higher than the  $\text{H}_2$  generation rate from the single decomposition reaction of  $\text{N}_2\text{H}_4 \cdot \text{H}_2\text{O}$  ( $0.62 \text{ mmol g}_{\text{Cat.}}^{-1} \text{ h}^{-1}$ ) over the same  $\text{TiO}_2/\text{Pt}/10\text{TiO}_2/\text{Ni}/\text{TiO}_2$  catalyst (Figures 3A and S4). Thus, hydrogen generation is accelerated during the tandem reaction. The influence of the distance between the Pt and Ni layers is conveniently investigated by precisely changing the thickness of the  $\text{TiO}_2$  interlayer. As shown in Figure 3B, the tandem catalytic activity increases as the ALD cycle number of the  $\text{TiO}_2$  interlayer decreases from 100 to 10, and  $\text{TiO}_2/\text{Pt}/10\text{TiO}_2/\text{Ni}/\text{TiO}_2$  exhibits the highest activity, indicating that a short distance is favorable for

the high catalytic activity in this tandem reaction, while the formation of a Ni-Pt alloy must be avoided. Since the selectivity of aniline is 99% for all the tested catalyst, the distance only influences the catalytic activity in the tandem reaction. Furthermore, the effects of the size of the Ni component and interlayer materials on the catalytic performance have also been investigated. The same tendency is also observed when decreasing the ALD cycle number of the Ni layer from 300 to 100 for the five-layer catalysts. When porous  $\text{Al}_2\text{O}_3$  or  $\text{ZnO}$  with different thicknesses were deposited as the interlayer (Figures 3C and S6), the activity in the tandem reaction was very low. In addition, the reusability of  $\text{TiO}_2/\text{Pt}/10\text{TiO}_2/\text{Ni}/\text{TiO}_2$  was tested. It exhibited nearly similar activity for five consecutive recycling runs, indicating its outstanding stability (Figure 3D). These results indicate that highly efficient synergy between the Ni and Pt sites at the subnanometer scale is generated by separating the two metal sites with an ultrathin reducible  $\text{TiO}_2$  interlayer.

### Transfer Mechanism of Active Hydrogen from Ni to Pt Sites

In the tandem reaction, the active hydrogen generated from the decomposition of  $\text{N}_2\text{H}_4 \cdot \text{H}_2\text{O}$  on the Ni layer needs to be transferred to the Pt layer for hydrogenation since the Ni and Pt sites of  $\text{TiO}_2/\text{Pt}/\text{yTiO}_2/\text{Ni}/\text{TiO}_2$  are separated by the  $\text{TiO}_2$  interlayer. The distance effect may be due to a change in the transfer mechanism of active hydrogen during the tandem reaction. To unveil the transfer mechanism of active hydrogen, isotopic experiments were then conducted to investigate the kinetic isotope effect using  $\text{D}_2\text{O}/\text{ethanol}$  as the solvent over the  $\text{TiO}_2/\text{Pt}/10\text{TiO}_2/\text{Ni}/\text{TiO}_2$  catalyst. At first, for single reactions,  $\text{D}_2\text{O}$  has nearly no isotope effect on either  $\text{N}_2\text{H}_4 \cdot \text{H}_2\text{O}$  decomposition or nitrobenzene hydrogenation in  $\text{H}_2$  due to the low  $k_{\text{H}_2\text{O}}/k_{\text{D}_2\text{O}}$  of approximately 1 (Figures 4A and 4B). However, there is an obvious activity decrease in  $\text{D}_2\text{O}/\text{ethanol}$  in the tandem reaction and a high  $k_{\text{H}_2\text{O}}/k_{\text{D}_2\text{O}}$  of 2.8 (Figure 4C). Further gas chromatography-mass spectrometry analysis shows that  $\text{C}_6\text{H}_5\text{NDH}$  ( $m/z = 94, 41.8\%$ ) and  $\text{C}_6\text{H}_5\text{ND}_2$  ( $m/z = 95, 41.0\%$ ) are the main products of the tandem reaction in  $\text{D}_2\text{O}/\text{ethanol}$  over the  $\text{TiO}_2/\text{Pt}/10\text{TiO}_2/\text{Ni}/\text{TiO}_2$  catalyst (Figures S7 and S8; Table S4). It can be seen that 62% of hydrogen atoms for the hydrogenation step are from  $\text{D}_2\text{O}$  instead of  $\text{N}_2\text{H}_4 \cdot \text{H}_2\text{O}$ . Therefore, it can be inferred that the active hydrogen transfer

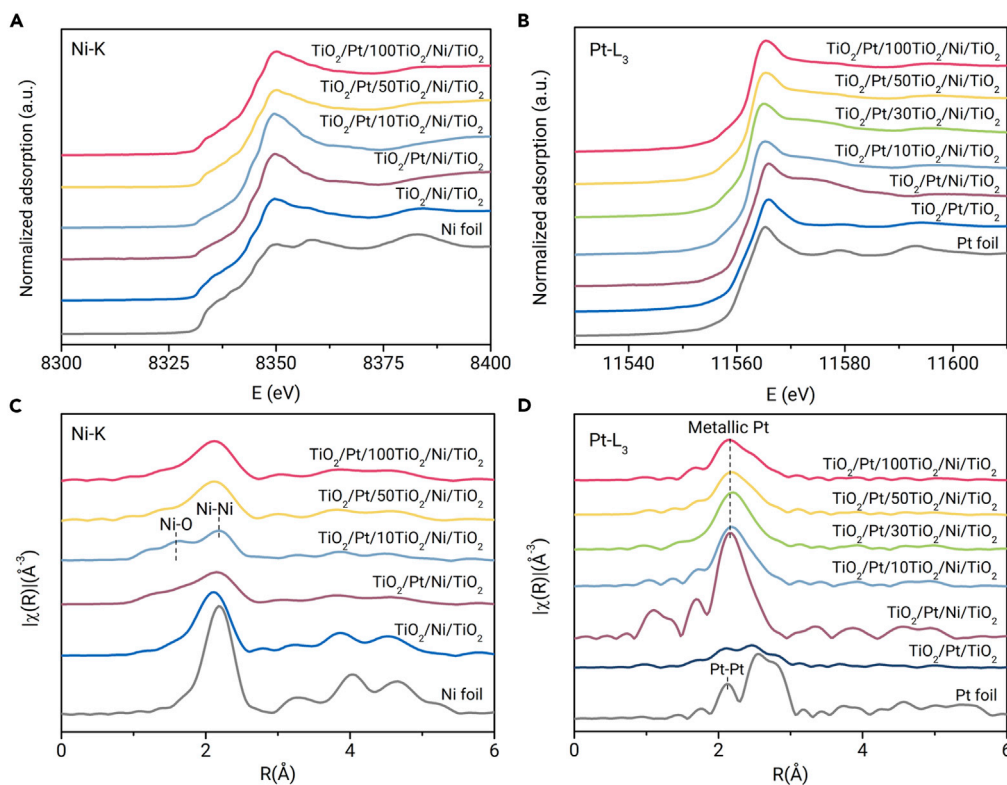

**Figure 2. Electronic Structure of the Catalysts.** The normalized intensity of XANES spectra for (A) Ni K and (B) Pt L<sub>3</sub>. The normalized intensity of Fourier transform weighted EXAFS spectra for (C) Ni K and (D) Pt L<sub>3</sub>.

involving cleavage of the O-H bond in the H<sub>2</sub>O solvent is the rate-determining step in the tandem reaction over the TiO<sub>2</sub>/Pt/10TiO<sub>2</sub>/Ni/TiO<sub>2</sub> catalyst.

Isotopic experiments for the tandem reaction were also conducted for different five-layer catalysts to reveal the influence of the thickness of the TiO<sub>2</sub> interlayer on hydrogen transfer. The  $k_{\text{H}_2\text{O}}/k_{\text{D}_2\text{O}}$  value decreased from 2.8 to 1.5 as the ALD cycle number of the TiO<sub>2</sub> interlayer increased from 10 to 300 (Figure 4D). This indicates that the active hydrogen transfer involving cleavage of the O-H bond is dramatically changed with the thickness of the TiO<sub>2</sub> interlayer. In principle, the decrease in the isotope effect is related to the decrease in activation energy and/or active site number on the interlayer for hydrogen transfer.<sup>37</sup> However, the dynamic experiments show that the calculated apparent activation energy is almost unchanged over different five-layer catalysts (Figure S9). This implies that the extent of water participation involving cleavage of the O-H bond during active hydrogen transfer is dramatically changed with the thickness of the TiO<sub>2</sub> interlayer. Thus, the decrease in the isotope effect indicates the decrease in active sites for hydrogen transfer on a thick TiO<sub>2</sub> interlayer. The corresponding perfect linear relationship between  $k_{\text{H}_2\text{O}}/k_{\text{D}_2\text{O}}$  and the reaction rate shown in Figure 4E further confirms this conclusion.

## DISCUSSION

Although many technologies have been developed for the distance control and spatial isolation of different functional sites, there is still no report on the precise control of the distance on the subnanometer scale to reveal the distance effect. In this work, the distance between the Ni and Pt layers was regulated precisely on the subnanometer scale by changing the thickness of the interlayer. The distance effect was revealed using the tandem decomposition of N<sub>2</sub>H<sub>4</sub>·H<sub>2</sub>O and hydrogenation of nitrobenzene as a model reaction. In this system, the Ni layer catalyzes only the decomposition of N<sub>2</sub>H<sub>4</sub>·H<sub>2</sub>O, while the hydrogenation of nitrobenzene proceeds on the Pt layer. The synergy of the two metal layers dramatically increases the activity in the tandem reaction and is enhanced with a short distance through a more efficient path. In this path, the active hydrogen atoms generated from the decomposition of

N<sub>2</sub>H<sub>4</sub>·H<sub>2</sub>O on the Ni layer are instantly transferred to the Pt layer for hydrogenation instead of desorption to produce H<sub>2</sub> molecules for the hydrogenation step. The strong isotope effect of D<sub>2</sub>O indicates that the active hydrogen transfer step via the dissociation and formation of the O-H bond on the surface of the TiO<sub>2</sub> interlayer predominantly determines the efficiency of the overall tandem reaction. A linear relationship between the  $k_{\text{H}_2\text{O}}/k_{\text{D}_2\text{O}}$  value and the reaction rate and unchanged apparent activation energy over the five-layer catalysts with different thicknesses of the TiO<sub>2</sub> interlayer indicates that the number of active sites for hydrogen transfer increases with decreasing thickness of the TiO<sub>2</sub> interlayer.

According to the EELS characterization, more reduced Ti oxide species ( $\leq 3+$ ) with oxygen vacancy defect sites ( $V_{\text{O}}$  sites) are generated on the thinner TiO<sub>2</sub> interlayer. Furthermore, H<sub>2</sub> temperature-programmed reduction (H<sub>2</sub>-TPR, Figure S10) results show that the reduction of TiO<sub>2</sub> shifts to lower temperatures for the five-layer catalyst with a thinner interlayer, indicating the formation of more reduced Ti oxide species with a thinner layer. These  $V_{\text{O}}$  sites on anatase TiO<sub>2</sub> can interact and coexist with water molecules.<sup>38</sup> With the assistance of the  $V_{\text{O}}$  sites and reduced Ti oxide species, the water molecules will easily interact with the surface O atoms of the TiO<sub>2</sub> interlayer to form surface O-H species ( $\text{H}_2\text{O} + \text{-Ti-V}_{\text{O}} + \text{-Ti-O} \rightarrow \text{-Ti-OH}$ )<sup>38,39</sup> and are expected to continuously adsorb/desorb on the water/TiO<sub>2</sub> interface facilitating hydrogen transfer. The hydrogen transfer can be well coupled with the spillover of active hydrogen at the metal-oxide interface with the -Ti-OH surface intermediate.<sup>40</sup> Therefore, we propose a plausible mechanism for active hydrogen transfer on the five-layer catalyst as shown in Figure 5. The active hydrogen atoms from the decomposition of N<sub>2</sub>H<sub>4</sub>·H<sub>2</sub>O (H-Ni) transfer from the Ni layer to the TiO<sub>2</sub> interlayer and further to the Pt interlayer for hydrogenation. Considering that the spillover of hydrogen is easy at the metal-oxide interface, the transfer of hydrogen on the interlayer with the aid of water predominantly determines the overall reaction rate of the tandem reaction. Since the reducibility of Al<sub>2</sub>O<sub>3</sub> and ZnO is not comparable with that of TiO<sub>2</sub>, the synergistic effect is considerably decreased due to less available surface O-H species when they are used as the interlayers. Therefore, both proper

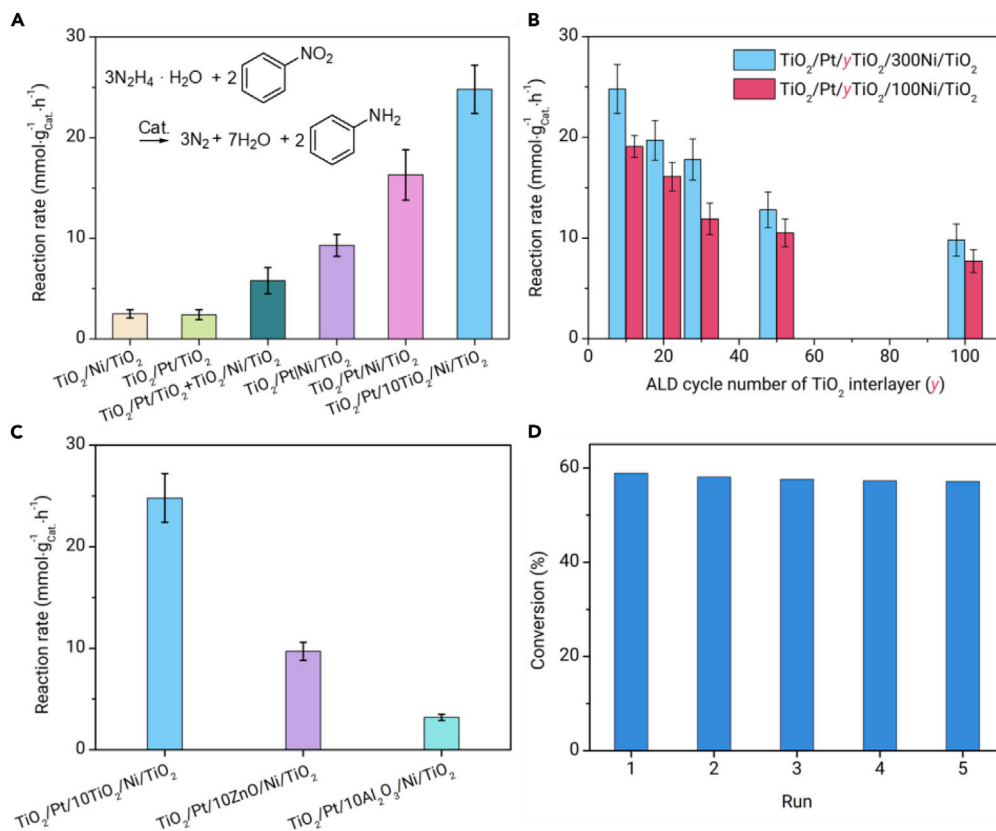

**Figure 3. Catalytic Performance.** (A) Tandem catalytic performance for nitrobenzene hydrogenation using  $\text{N}_2\text{H}_4 \cdot \text{H}_2\text{O}$  as the hydrogen source over  $\text{TiO}_2/\text{Ni}/\text{TiO}_2$ ,  $\text{TiO}_2/\text{Pt}/\text{TiO}_2$ , a physical mixture of  $\text{TiO}_2/\text{Ni}/\text{TiO}_2$  and  $\text{TiO}_2/\text{Pt}/\text{TiO}_2$ ,  $\text{TiO}_2/\text{Pt}/\text{Ni}/\text{TiO}_2$ ,  $\text{TiO}_2/\text{Pt}/\text{Ni}/\text{TiO}_2$ , and  $\text{TiO}_2/\text{Pt}/10\text{TiO}_2/\text{Ni}/\text{TiO}_2$ . (B) The influence of the interlayer thickness and Ni content of  $\text{TiO}_2/\text{Pt}/y\text{TiO}_2/x\text{Ni}/\text{TiO}_2$  on the catalytic activity. (C) Comparison of the catalytic performance of  $\text{TiO}_2/\text{Pt}/10\text{TiO}_2/\text{Ni}/\text{TiO}_2$ ,  $\text{TiO}_2/\text{Pt}/10\text{ZnO}/\text{Ni}/\text{TiO}_2$ , and  $\text{TiO}_2/\text{Pt}/10\text{Al}_2\text{O}_3/\text{Ni}/\text{TiO}_2$  with different interlayers for the tandem reaction. (D) Recycling tests of  $\text{TiO}_2/\text{Pt}/10\text{TiO}_2/\text{Ni}/\text{TiO}_2$  in the tandem reaction.

distance and medium for the transfer of active intermediates are critically important for the efficient synergy of dual-site tandem catalysts.

## Conclusions

In summary, we successfully revealed the distance effect of Ni and Pt sites in the tandem reaction by developing a  $\text{TiO}_2/\text{Pt}/\text{TiO}_2/\text{Ni}/\text{TiO}_2$  five-layer catalyst with a precise thickness-controlled  $\text{TiO}_2$  interlayer. Higher efficiency on the tandem reaction is observed with a small distance on the subnanometer scale. The distance effect controls the transfer of active hydrogen, which is the rate-determining step of the tandem reaction in water. The reduced Ti species with oxygen vacancies on the  $\text{TiO}_2$  interlayer provide the active sites for hydrogen transfer with the  $-\text{Ti}-\text{OH}$  surface intermediates via the continuous chemisorption/desorption of water. A smaller distance induces more active sites for hydrogen transfer and higher efficiency in the synergy of Ni and Pt sites.

## MATERIALS AND METHODS

### ALD

The ALD processes of  $\text{TiO}_2$ , Pt nanoparticles, NiO, polyimide, Al hybrid film, and ZnO were conducted at a hot-wall closed chamber-type ALD reactor with different ALD processes as we have described.<sup>31</sup> The Al-hybrid film was deposited at  $180^\circ\text{C}$  with trimethylaluminum (TMA) and ethylene glycol (EG) ( $80^\circ\text{C}$ ) as precursors. The pulse, exposure, and purge time were 0.02, 8, and 25 s for TMA and 1, 10, and 25 s for EG, respectively. Porous  $\text{Al}_2\text{O}_3$  film is obtained after the calcination of the Al-hybrid film. The deposition of ZnO was conducted at  $180^\circ\text{C}$  with diethylzinc and deionized water as precursors. The pulse, exposure, and purge time were 0.02, 8, and 25 s for diethylzinc and 1, 10, and 25 s for  $\text{H}_2\text{O}$ , respectively.

### Catalysts Preparation

All catalysts were prepared by template-assisted ALD. Typically,  $\text{TiO}_2/\text{Pt}/y\text{TiO}_2/x\text{Ni}/\text{TiO}_2$  was prepared by the sequential deposition of 300 cycles  $\text{TiO}_2$ ,  $x$  cycles Ni ( $x = 100$

or 300),  $y$  cycles  $\text{TiO}_2$  interlayer ( $y = 10\text{--}100$ ), 20 cycles Pt, 300 cycles  $\text{TiO}_2$  on CNFs, followed by calcination in the air to remove the CNFs at  $450^\circ\text{C}$  for 1.5 h and then reduced in 5%  $\text{H}_2/\text{Ar}$  at  $380^\circ\text{C}$  for 2 h. Typically, the 20 mg of CNFs were dispersed into the alcohol and uniformly spread over a quartz wafer ( $8 \times 8 \text{ cm}$ ). After the evaporation of ethanol, the quartz wafer with CNFs was transferred to the ALD chamber. For the five-layer catalyst, about 30 mg of catalysts are obtained after the calcination to remove the CNFs for every ALD process.  $\text{TiO}_2/\text{Ni}/\text{TiO}_2$  and  $\text{TiO}_2/\text{Pt}/\text{TiO}_2$  with one metal layer and  $\text{TiO}_2/\text{Pt}/\text{Ni}/\text{TiO}_2$  with no interlayer were prepared by a similar method.  $\text{TiO}_2/\text{Pt}/\text{ZnO}/\text{Ni}/\text{TiO}_2$  and  $\text{TiO}_2/\text{Pt}/\text{Al}_2\text{O}_3/\text{Ni}/\text{TiO}_2$  were prepared by changing the interlayer to ZnO or  $\text{Al}_2\text{O}_3$ . The  $\text{TiO}_2/\text{Pt}/\text{Ni}/\text{TiO}_2$  with a tube-in-tube structure were synthesized using polyimide as the sacrificial layer. The CNFs were synthesized at  $280^\circ\text{C}$  by chemical vapor deposition using copper nanoparticles as catalyst and acetylene as a feed gas.<sup>41</sup> The CNFs were carbonized at  $900^\circ\text{C}$  in Ar and further treated by an  $\text{HNO}_3$  aqueous solution (25 wt%) at  $100^\circ\text{C}$  before the deposition.

### Catalysts Characterization

TEM and high-resolution TEM were conducted using a JEOL-2100F field emission transmission microscope. HAADF-STEM images and EDX mapping profiles were collected on an atomic resolution analytical microscope (JEOL ARM-200F) operated at 200 kV. The XRD patterns were recorded using a Philips X'Pert Pro Super X-ray diffractometer with  $\text{Cu K}\alpha$  radiation ( $\lambda = 1.540 \text{ \AA}$ ).  $\text{N}_2$  adsorption-desorption experiments were performed on a BELSORP-Mini system at 77 K. The specific surface area was determined using the Brunauer-Emmett-Teller method, and the pore size distributions were calculated by the Barrett-Joyner-Halenda method according to the desorption branches. The XANES and EXAFS spectra of the Pt  $\text{L}_{3\text{-edge}}$  and Ni K-edge were measured on the BL14W1 beamline of the Shanghai Synchrotron Radiation Facility, Shanghai Institute of Applied Physics, China, operated at 3.5 GeV.<sup>42</sup> A Si (111) double-crystal monochromator was used to reduce the harmonic component of the monochrome beam. Pt foil,  $\text{PtO}_2$ , and Ni foil were used as reference samples. The XANES and EXAFS spectra of the Pt  $\text{L}_{3\text{-edge}}$  were measured in fluorescence mode, while the XANES and EXAFS spectra of the Ni K-edge were measured in transmission mode. Hydrogen pulse adsorption experiments and  $\text{H}_2$ -TPR were performed in a tubular quartz reactor (TP-5080 Tianjin Xianquan, China). Typically, 50 mg of sample was loaded and pre-treated at  $380^\circ\text{C}$  for 2 h in 10%  $\text{H}_2/\text{N}_2$  flow, and then swept with

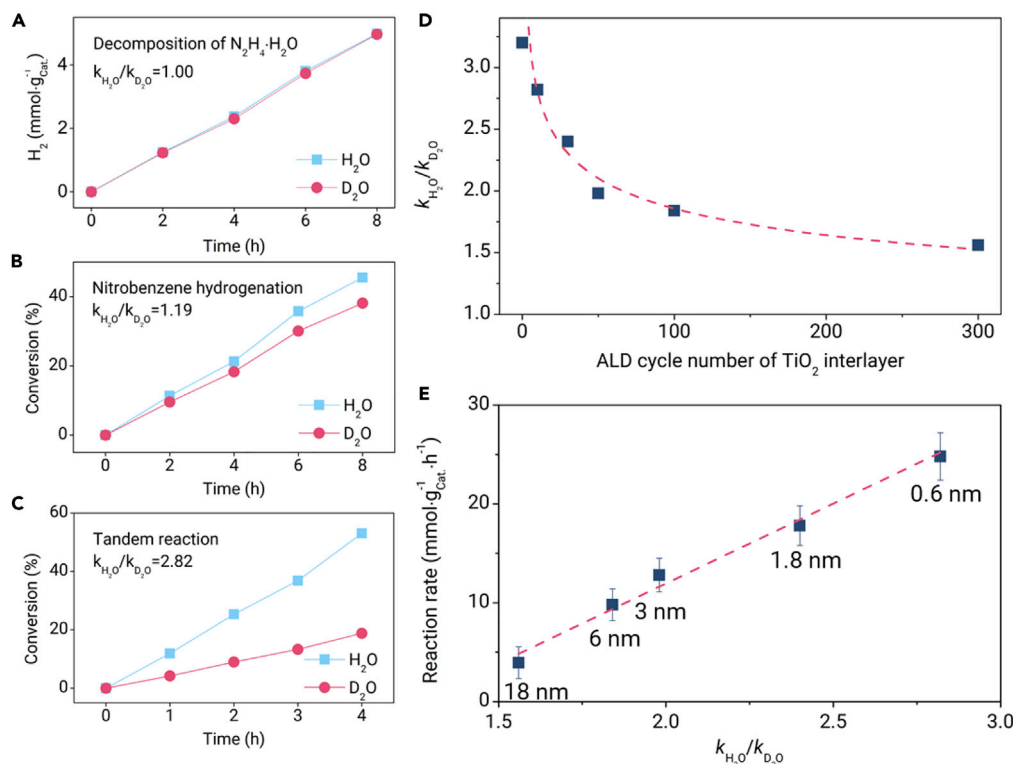

$N_2$  at a flow rate of 40 mL/min.  $H_2$  pulse adsorption was performed in  $N_2$  flow at 30°C to test the number of active metal sites.  $H_2$ -TPR was performed by heating the sample from 30°C to 900°C at a ramp rate of 10°C/min in a 10%  $H_2/N_2$  flow.

#### Catalytic Performance Tests

Tandem decomposition of  $N_2H_4 \cdot H_2O$  and hydrogenation of nitrobenzene was conducted in a 25-mL stainless-steel autoclave. Typically, 240 mg nitrobenzene, 800 mg  $N_2H_4 \cdot H_2O$ , 10 mg catalysts, 5 mL deionized water, and 5 mL ethanol were added

into the autoclave. After flushing with ultrahigh-purity Ar for three cycles, the reaction proceeded under magnetic stirring with a rate of 700 rpm at 30°C for 2 h. For recycling tests of the  $TiO_2/Pt/10TiO_2/Ni/TiO_2$  catalyst in the tandem reaction, the reaction time increases to 4 h for each run. After catalytic reaction, the catalysts were collected by centrifugation, washing, drying, and reduction (380°C in 5%  $H_2/Ar$ ) for the next run during the recycling tests. The liquid reaction products were analyzed by gas chromatography (Zhejiang Full Chromatogram Analysis, China) equipped with a flame ionization detector. The hydrogenation of nitrobenzene in  $H_2$  followed a similar procedure of tandem reaction, except for changing the hydrogen source from  $N_2H_4 \cdot H_2O$  to 1.0 MPa  $H_2$ .

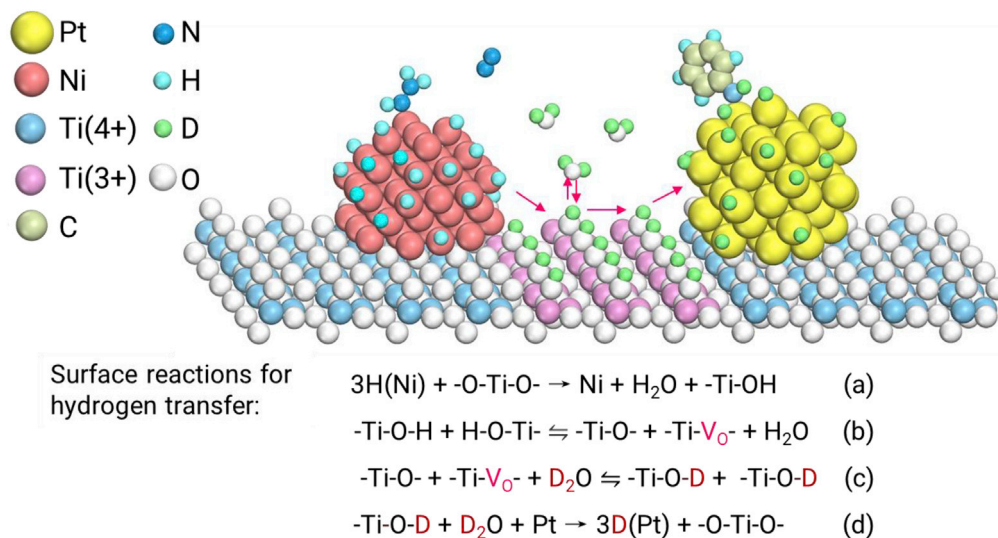

**Figure 5. Transfer Mechanism of Active Hydrogen on the  $TiO_2$  Interlayer by Water Participation in the Tandem Reaction**

The decomposition of  $\text{N}_2\text{H}_4 \cdot \text{H}_2\text{O}$  was tested in a 25-mL three-necked flask; 800 mg  $\text{N}_2\text{H}_4 \cdot \text{H}_2\text{O}$ , 10 mg catalysts, and 10 mL deionized water were co-added into the flask under magnetic stirring with a rate of 700 rpm at 30°C.

## REFERENCES

- Lohr, T.L., and Marks, T.J. (2015). Orthogonal tandem catalysis. *Nat. Chem.* **7**, 477–482.
- Wasilke, J.-C., Obrey, S.J., Baker, R.T., and Bazan, G.C. (2005). Concurrent tandem catalysis. *Chem. Rev.* **105**, 1001–1020.
- Yamada, Y., Tsung, C.-K., Huang, W., Huo, Z., Habas, S.E., Soejima, T., Aliaga, C.E., Somorjai, G.A., and Yang, P. (2011). Nanocrystal bilayer for tandem catalysis. *Nat. Chem.* **3**, 372–376.
- Li, Z., Assary, R.S., Atesin, A.C., Curtiss, L.A., and Marks, T.J. (2014). Rapid ether and alcohol C–O bond hydrogenolysis catalyzed by tandem high-valent metal triflate + supported Pd catalysts. *J. Am. Chem. Soc.* **136**, 104–107.
- Zecevic, J., Vanbutsele, G., de Jong, K.P., and Martens, J.A. (2015). Nanoscale intimacy in bifunctional catalysts for selective conversion of hydrocarbons. *Nature* **528**, 245–248.
- Jiao, F., Li, J., Pan, X., Xiao, J., Li, H., Ma, H., Wei, M., Pan, Y., Zhou, Z., Li, M., et al. (2016). Selective conversion of syngas to light olefins. *Science* **351**, 1065–1068.
- Gao, P., Li, S., Bu, X., Dang, S., Liu, Z., Wang, H., Zhong, L., Qiu, M., Yang, C., Cai, J., et al. (2017). Direct conversion of  $\text{CO}_2$  into liquid fuels with high selectivity over a bifunctional catalyst. *Nat. Chem.* **9**, 1019–1024.
- Gao, P., Dang, S., Li, S., Bu, X., Liu, Z., Qiu, M., Yang, C., Wang, H., Zhong, L., Han, Y., et al. (2018). Direct production of lower olefins from  $\text{CO}_2$  conversion via bifunctional catalysis. *ACS Catal.* **8**, 571–578.
- Bao, J., He, J., Zhang, Y., Yoneyama, Y., and Tsubaki, N. (2008). A core/shell catalyst produces a spatially confined effect and shape selectivity in a consecutive reaction. *Angew. Chem. Int. Ed.* **47**, 353–356.
- Yang, G., Tsubaki, N., Shamoto, J., Yoneyama, Y., and Zhang, Y. (2010). Confinement effect and synergistic function of H-ZSM-5/Cu-ZnO- $\text{Al}_2\text{O}_3$  capsule catalyst for one-step controlled synthesis. *J. Am. Chem. Soc.* **132**, 8129–8136.
- Cheng, K., Zhou, W., Kang, J., He, S., Shi, S., Zhang, Q., Pan, Y., Wen, W., and Wang, Y. (2017). Bifunctional catalysts for one-step conversion of syngas into aromatics with excellent selectivity and stability. *Chem* **3**, 334–347.
- Zhao, B., Zhai, P., Wang, P., Li, J., Li, T., Peng, M., Zhao, M., Hu, G., Yang, Y., Li, Y.-W., et al. (2017). Direct transformation of syngas to aromatics over Na-Zn- $\text{Fe}_3\text{C}_2$  and hierarchical HZSM-5 tandem catalysts. *Chem* **3**, 323–333.
- George, S.M. (2010). Atomic layer deposition: an overview. *Chem. Rev.* **110**, 111–131.
- Zhang, B., and Qin, Y. (2018). Interface tailoring of heterogeneous catalysts by atomic layer deposition. *ACS Catal.* **8**, 10064–10081.
- Detavernier, C., Dendooven, J., Sree, S.P., Ludwig, K.F., and Martens, J.A. (2011). Tailoring nanoporous materials by atomic layer deposition. *Chem. Soc. Rev.* **40**, 5242–5253.
- Knez, M., Nielsch, K., and Niinistö, L. (2007). Synthesis and surface engineering of complex nanostructures by atomic layer deposition. *Adv. Mater.* **19**, 3425–3438.
- Lu, J., Elam, J.W., and Stair, P.C. (2013). Synthesis and stabilization of supported metal catalysts by atomic layer deposition. *Acc. Chem. Res.* **46**, 1806–1815.
- O'Neill, B.J., Jackson, D.H.K., Lee, J., Canlas, C., Stair, P.C., Marshall, C.L., Elam, J.W., Kuech, T.F., Dumesic, J.A., and Huber, G.W. (2015). Catalyst design with atomic layer deposition. *ACS Catal.* **5**, 1804–1825.
- Zhang, B., Guo, X.-W., Liang, H., Ge, H., Gu, X., Chen, S., Yang, H., and Qin, Y. (2016). Tailoring Pt– $\text{Fe}_2\text{O}_3$  interfaces for selective reductive coupling reaction to synthesize imine. *ACS Catal.* **6**, 6560–6566.
- Cao, K., Cai, J., Liu, X., and Chen, R. (2018). Catalysts design and synthesis via selective atomic layer deposition. *J. Vac. Sci. Technol. A* **36**, 010801.
- Zhang, S., Zhang, B., Liang, H., Liu, Y., Qiao, Y., and Qin, Y. (2018). Encapsulation of homogeneous catalysts in mesoporous materials using diffusion-limited atomic layer deposition. *Angew. Chem. Int. Ed.* **57**, 1091–1095.
- Cao, L., Liu, W., Luo, Q., Yin, R., Wang, B., Weissenrieder, J., Soldemo, M., Yan, H., Lin, Y., Sun, Z., et al. (2019). Atomically dispersed iron hydroxide anchored on Pt for preferential oxidation of CO in  $\text{H}_2$ . *Nature* **565**, 631–635.
- Zhang, H.B., and Marshall, C.L. (2019). Atomic layer deposition: catalytic preparation and modification technique for the next generation. *Chin. J. Catal.* **40**, 1311–1323.
- Yang, H.M., Chen, Y., and Qin, Y. (2020). Application of atomic layer deposition in fabricating high-efficiency electrocatalysts. *Chin. J. Catal.* **41**, 227–241.
- Gao, Z., Dong, M., Wang, G.G., Sheng, P., Wu, Z., Yang, H., Zhang, B., Wang, G.G., Wang, J., and Qin, Y. (2015). Multiply confined nickel nanocatalysts produced by atomic layer deposition for hydrogenation reactions. *Angew. Chem. Int. Ed.* **54**, 9006–9010.
- Gao, Z., and Qin, Y. (2017). Design and properties of confined nanocatalysts by atomic layer deposition. *Acc. Chem. Res.* **50**, 2309–2316.
- Ge, H., Zhang, B., Liang, H., Zhang, M., Fang, K., Chen, Y., and Qin, Y. (2020). Photocatalytic conversion of  $\text{CO}_2$  into light olefins over  $\text{TiO}_2$  nanotube confined Cu clusters with high ratio of  $\text{Cu}^+$ . *Appl. Catal. B Environ.* **263**, 118133.
- Liang, H., Zhang, B., Ge, H., Gu, X., Zhang, S., and Qin, Y. (2017). Porous  $\text{TiO}_2/\text{Pt}/\text{TiO}_2$  sandwich catalyst for highly selective semihydrogenation of alkyne to olefin. *ACS Catal.* **7**, 6567–6572.
- Zhang, J., Yu, Z., Gao, Z., Ge, H., Zhao, S., Chen, C., Chen, S., Tong, X., Wang, M., Zheng, Z., and Qin, Y. (2017). Porous  $\text{TiO}_2$  nanotubes with spatially separated platinum and  $\text{CoO}_x$  cocatalysts produced by atomic layer deposition for photocatalytic hydrogen production. *Angew. Chem. Int. Ed.* **56**, 816–820.
- Zhang, J., Gao, Z., Wang, S., Wang, G., Gao, X., Zhang, B., Xing, S., Zhao, S., and Qin, Y. (2019). Origin of synergistic effects in bicomponent cobalt oxide-platinum catalysts for selective hydrogenation reaction. *Nat. Commun.* **10**, 4166.
- Ge, H., Zhang, B., Gu, X., Liang, H., Yang, H., Gao, Z., Wang, J., and Qin, Y. (2016). A tandem catalyst with multiple metal oxide interfaces produced by atomic layer deposition. *Angew. Chem. Int. Ed.* **55**, 7081–7085.
- Lu, X., Chen, A., Luo, Y., Lu, P., Dai, Y., Enriquez, E., Dowden, P., Xu, H., Kotula, P.G., Azad, A.K., et al. (2016). Conducting interface in oxide homojunction: understanding of superior properties in black  $\text{TiO}_2$ . *Nano Lett.* **16**, 5751–5755.
- Bertoni, G., Beyers, E., Verbeeck, J., Mertens, M., Cool, P., Vansant, E.F., and Van Tendeloo, G. (2006). Quantification of crystalline and amorphous content in porous samples from electron energy loss spectroscopy. *Ultramicroscopy* **106**, 630–635.
- Dinh, C.-T., Jain, A., de Arquer, F.P.G., De Luna, P., Li, J., Wang, N., Zheng, X., Cai, J., Gregory, B.Z., Voznyy, O., et al. (2019). Multi-site electrocatalysts for hydrogen evolution in neutral media by destabilization of water molecules. *Nat. Energy* **4**, 107–114.
- Beale, A.M., and Weckhuysen, B.M. (2010). EXAFS as a tool to interrogate the size and shape of mono and bimetallic catalyst nanoparticles. *Phys. Chem. Chem. Phys.* **12**, 5562–5574.
- He, L., Liang, B., Huang, Y., and Zhang, T. (2017). Design strategies of highly selective nickel catalysts for  $\text{H}_2$  production via hydrous hydrazine decomposition: a review. *Natl. Sci. Rev.* **5**, 356–364.
- Wiberg, K.B. (1955). The deuterium isotope effect. *Chem. Rev.* **55**, 713–743.
- Fiscaro, G., Filice, S., Scalse, S., Compagnini, G., Reitano, R., Genovese, L., Goedecker, S., Deretzis, I., and La Magna, A. (2020). Wet environment effects for ethanol and water adsorption on anatase  $\text{TiO}_2$  (101) surfaces. *J. Phys. Chem. C* **124**, 2406–2419.
- Ketteler, G., Yamamoto, S., Bluhm, H., Andersson, K., Starr, D.E., Ogletree, D.F., Ogasawara, H., Nilsson, A., and Salmeron, M. (2007). The nature of water nucleation sites on  $\text{TiO}_2(110)$  surfaces revealed by ambient pressure X-ray photoelectron spectroscopy. *J. Phys. Chem. C* **111**, 8278–8282.
- Wan, W., Nie, X., Janik, M.J., Song, C., and Guo, X. (2018). Adsorption, dissociation, and spillover of hydrogen over Au/ $\text{TiO}_2$  catalysts: the effects of cluster size and metal-support interaction from DFT. *J. Phys. Chem. C* **122**, 17895–17916.
- Qin, Y., Zhang, Z., and Cui, Z. (2003). Helical carbon nanofibers prepared by pyrolysis of acetylene with a catalyst derived from the decomposition of copper tartrate. *Carbon* **41**, 3072–3074.
- Yu, H.-S., Wei, X.-J., Li, J., Gu, S.-Q., Zhang, S., Wang, L.-H., Ma, J., Li, L.-N., Gao, Q., Si, R., et al. (2015). The XAFS beamline of SSRF. *Nucl. Sci. Tech.* **26**, 050102.

## ACKNOWLEDGMENTS

We acknowledge the characterization support from the Shanghai Synchrotron Radiation Facility, Shanghai Institute of Applied Physics, Shanghai, People's Republic of China. This work was supported by National Natural Science Foundation of China (21872160, 21673269, and U1832208), National Science Fund for Distinguished Young Scholars (21825204), the National Key R&D Program of China (2017YFA0700101 and 2018YFB1501602), the Youth Innovation Promotion Association CAS (2017204), and Natural Science Foundation of Shanxi Province (201901D211591).

## DECLARATION OF INTERESTS

The authors declare no competing interests.

## SUPPLEMENTAL INFORMATION

Supplemental Information can be found online at <https://doi.org/10.1016/j.xinn.2020.100029>.



**XINN, Volume 1**

**Supplemental Information**

**Distance Effect of Ni-Pt Dual Sites for Active  
Hydrogen Transfer in Tandem Reaction**

**Huibin Wu, Bin Zhang, Haojie Liang, Liming Zhai, Guofu Wang, and Yong Qin**

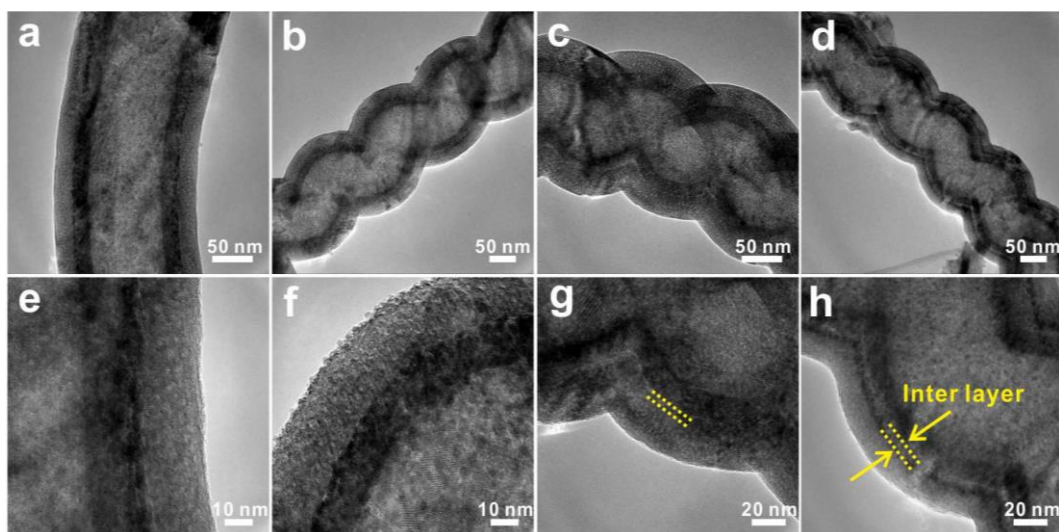

**Supplemental Figure 1.** Structure characterization of five-layer catalyst. TEM images of (a, e)  $\text{TiO}_2/\text{Pt}/\text{Ni}/\text{TiO}_2$ , (b, f)  $\text{TiO}_2/\text{Pt}/10\text{TiO}_2/\text{Ni}/\text{TiO}_2$ , (c, g)  $\text{TiO}_2/\text{Pt}/30\text{TiO}_2/\text{Ni}/\text{TiO}_2$ , (d, h)  $\text{TiO}_2/\text{Pt}/50\text{TiO}_2/\text{Ni}/\text{TiO}_2$ .

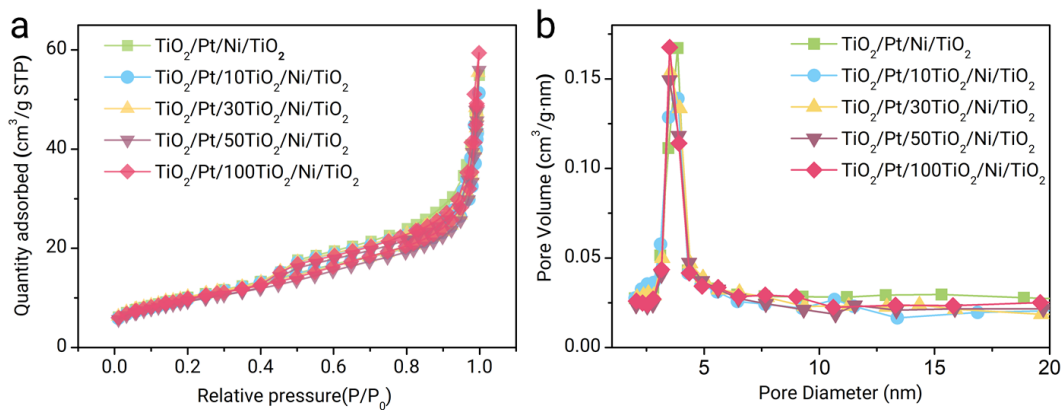

**Supplemental Figure 2.** (a)  $\text{N}_2$  adsorption-desorption isotherms of different samples. (b) The pore size distribution of different catalysts using the BJH method.

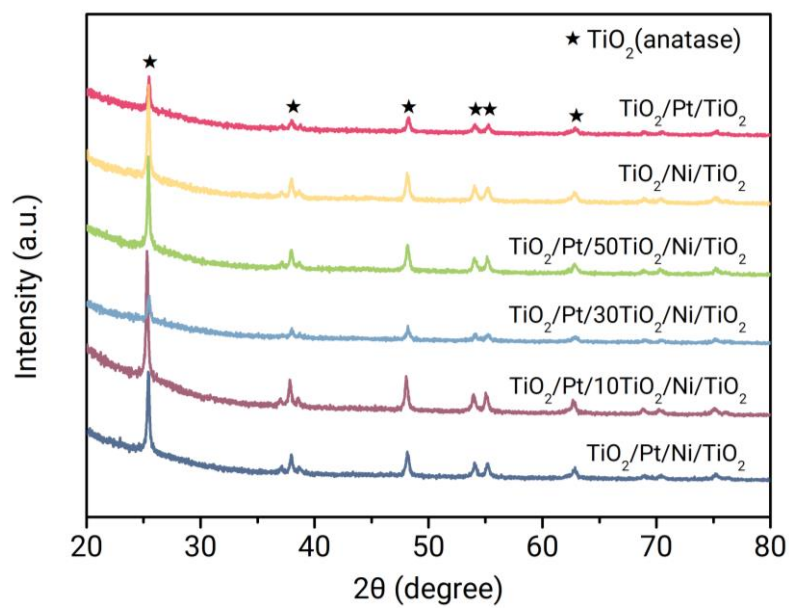

**Supplemental Figure 3.** XRD profiles of different catalysts.

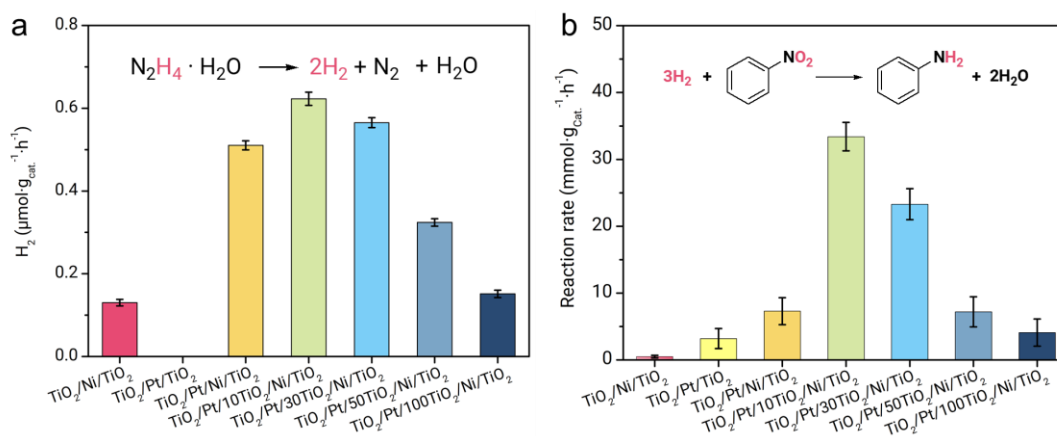

**Supplemental Figure 4.** (a) Catalytic performance of different catalysts in the decomposition of hydrazine hydrate to hydrogen at 30°C. (b) Catalytic performance of different catalysts in hydrogenation of nitrobenzene using  $\text{H}_2$  (10 bar) as a hydrogen source at 30°C. Control experiments were performed for the decomposition of  $\text{N}_2\text{H}_4 \cdot \text{H}_2\text{O}$  and nitrobenzene hydrogenation (single reaction). It can be found that  $\text{TiO}_2/\text{Pt}/\text{TiO}_2$  has no catalytic activity for the decomposition of  $\text{N}_2\text{H}_4 \cdot \text{H}_2\text{O}$ , and  $\text{TiO}_2/\text{Ni}/\text{TiO}_2$  has low activity in nitrobenzene hydrogenation, confirming the clear division of Ni and Pt layer in hydrogen generation and hydrogenation, respectively. Compared to the  $\text{TiO}_2/\text{Pt}/\text{Ni}/\text{TiO}_2$  without the  $\text{TiO}_2$  interlayer, the five-layer catalyst with a thinner interlayer performs a higher activity in both single reactions. This phenomenon is more obvious in the hydrogenation reaction.

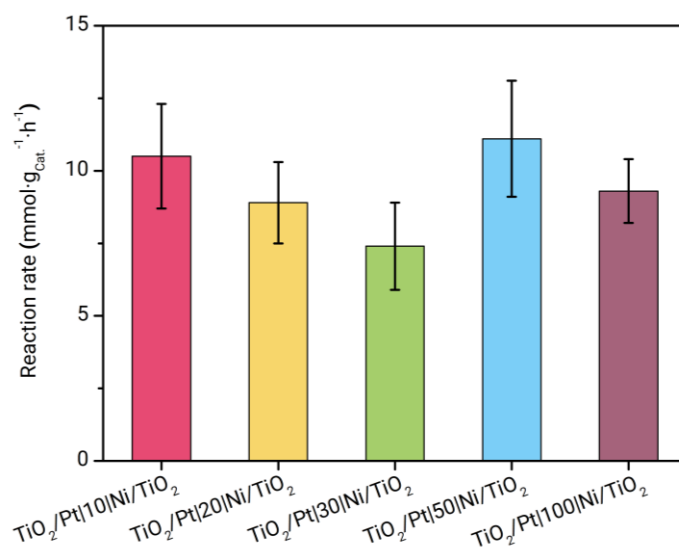

**Supplemental Figure 5.** Catalytic performance of the TiO<sub>2</sub>/Pt- $x$ -Ni/TiO<sub>2</sub> tube-in-tube catalysts ( $x=10, 20, 30, 50, 100$ ) for the nitrobenzene hydrogenation using N<sub>2</sub>H<sub>4</sub>·H<sub>2</sub>O as the hydrogen source.  $x$  is the ALD cycle number of the sacrificial layer of polyimide. The nanospace between Ni and Pt layers of TiO<sub>2</sub>/Pt|Ni/TiO<sub>2</sub> tube-in-tube catalyst without interlayer is controlled by changing the thickness of the polyimide sacrificial layer. However, the activity is fluctuated within a small range due to the relative movement of the inner and outer TiO<sub>2</sub> layers during the reaction. The optimized catalytic performance of the TiO<sub>2</sub>/Pt|Ni/TiO<sub>2</sub> tube-in-tube catalyst is closed to that of TiO<sub>2</sub>/Pt/100TiO<sub>2</sub>/Ni/TiO<sub>2</sub>, and lower than that of TiO<sub>2</sub>/Pt/10TiO<sub>2</sub>/Ni/TiO<sub>2</sub>.

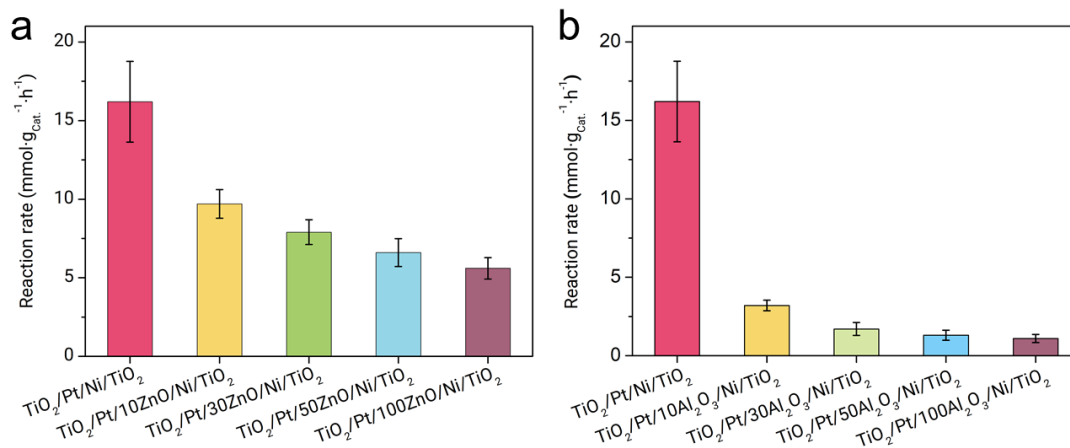

**Supplemental Figure 6.** The catalytic performance of TiO<sub>2</sub>/Pt/xZnO/Ni/TiO<sub>2</sub> and TiO<sub>2</sub>/Pt/xAl<sub>2</sub>O<sub>3</sub>/Ni/TiO<sub>2</sub> with different thickness of interlayer for the nitrobenzene hydrogenation using N<sub>2</sub>H<sub>4</sub>·H<sub>2</sub>O as the hydrogen source.

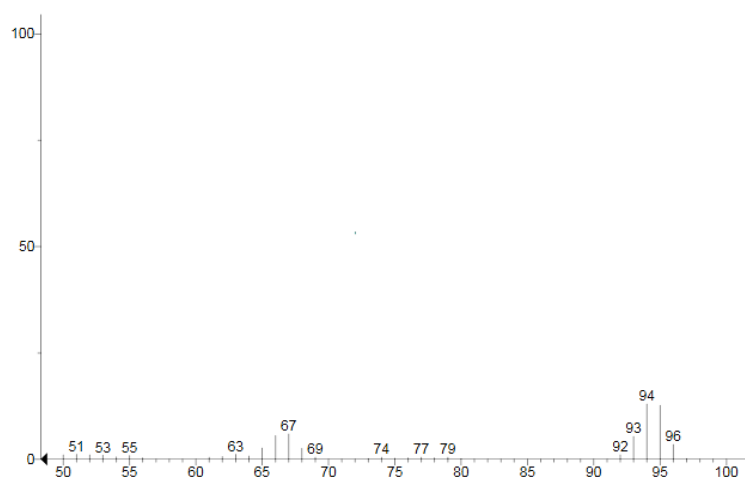

**Supplemental Figure 7.** GC-MS spectra of the liquid products of the tandem reaction catalyzed by  $\text{TiO}_2/\text{Pt}/10\text{TiO}_2/\text{Ni}/\text{TiO}_2$  using  $\text{D}_2\text{O}$  and ethanol as solvent. The peak  $m/z = 93, 94, 95$  are attributed to  $\text{C}_6\text{H}_5\text{NH}_2, \text{C}_6\text{H}_5\text{NDH}, \text{C}_6\text{H}_5\text{ND}_2$  respectively. This result indicates that 62% of hydrogen is from water during the tandem reaction over  $\text{TiO}_2/\text{Pt}/10\text{TiO}_2/\text{Ni}/\text{TiO}_2$ .



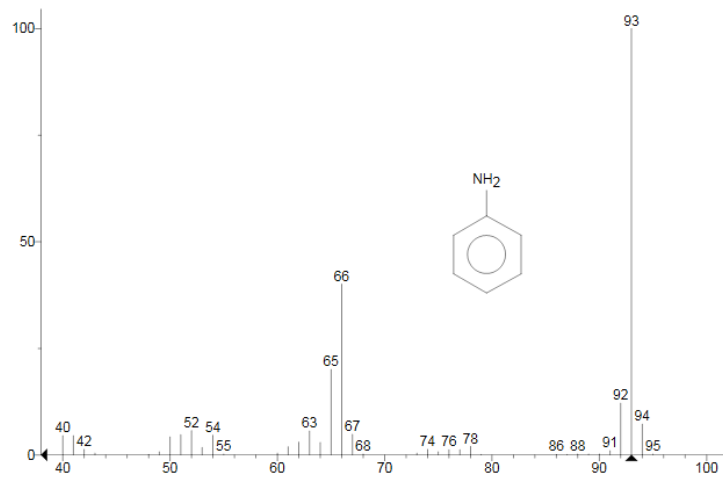

**Supplemental Figure 8.** GC-MS spectra of the standard aniline.

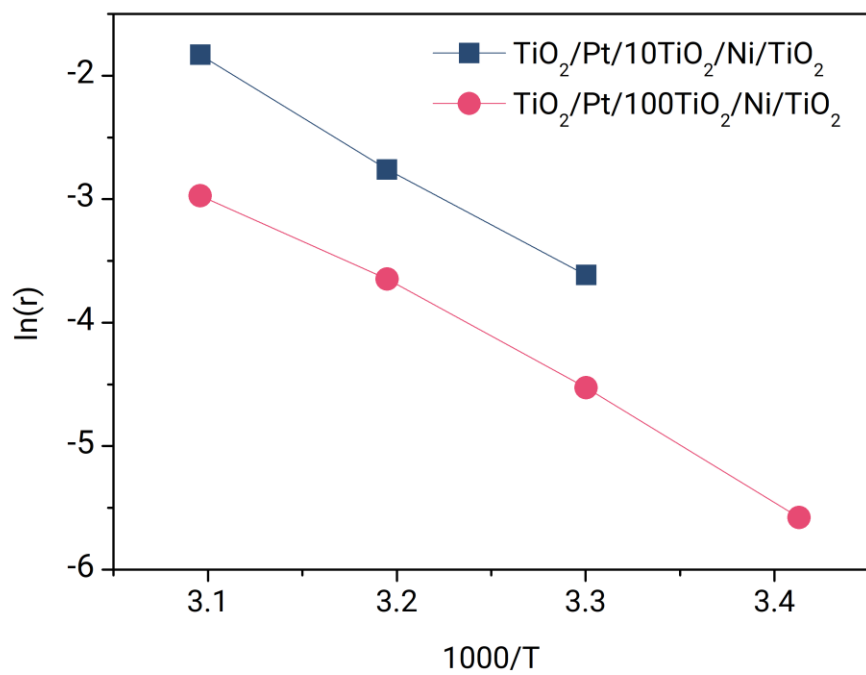

**Supplemental Figure 9.** The Arrhenius plots of five-layer catalysts with different thickness of interlayer in the tandem reaction.

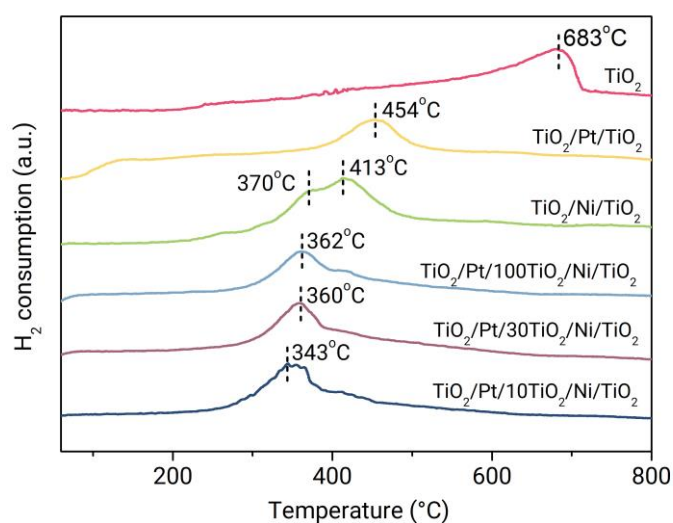

**Supplemental Figure 10.** The H<sub>2</sub>-TPR spectra of different samples. Since the loading of Ni (1.39-1.41 wt%) and Pt (0.39-0.41 wt%) in the catalyst is low, the main reduction peak belongs to the partial reduction of TiO<sub>2</sub>. Compared to the TiO<sub>2</sub> without metal (683°C), the reduction peak of the TiO<sub>2</sub>/Pt/TiO<sub>2</sub> (454°C) and TiO<sub>2</sub>/Ni/TiO<sub>2</sub> (413°C and 370°C) shifts to lower temperature. Thus, the reduction of TiO<sub>2</sub> is more easily with the assistant of Pt or Ni. Furthermore, the reduction peak of TiO<sub>2</sub> shifts to lower temperatures for the TiO<sub>2</sub>/Pt/TiO<sub>2</sub>/Ni/TiO<sub>2</sub> five-layer catalysts. We can notice that the reduction temperature decreases with the thickness decrease of the TiO<sub>2</sub> interlayer. This indicates that the formation energy barrier of the reduced Ti oxide species is lower with a thinner TiO<sub>2</sub> interlayer due to the synergy of Pt and Ni layer. Since the hydrogen spillover is a reversible and dynamic equilibrium process, the active hydrogen can easily transfer between metal through the interlayer for the formation of more reduced Ti oxide species.

**Supplemental Table 1.** Physicochemical characteristics of different catalysts.

| Catalyst                                                      | Metal loading          |      | $S_{\text{BET}}$<br>( $\text{m}^2\cdot\text{g}^{-1}$ ) | $D_{\text{BJH}}$<br>(nm) | $V_{\text{BJH}}$<br>( $\text{m}^3\cdot\text{g}^{-1}$ ) | $\text{H}_2$ uptake<br>( $\mu\text{mol}\cdot\text{g}^{-1}$ ) <sup>[c]</sup> | TOF<br>( $\text{h}^{-1}$ ) <sup>[d]</sup> |
|---------------------------------------------------------------|------------------------|------|--------------------------------------------------------|--------------------------|--------------------------------------------------------|-----------------------------------------------------------------------------|-------------------------------------------|
|                                                               | (wt. %) <sup>[a]</sup> |      |                                                        |                          |                                                        |                                                                             |                                           |
|                                                               | Ni                     | Pt   | <sup>[b]</sup>                                         | <sup>[b]</sup>           | <sup>[b]</sup>                                         |                                                                             |                                           |
| TiO <sub>2</sub> /Pt/Ni/TiO <sub>2</sub>                      | 1.40                   | 0.39 | 36.5                                                   | 3.7                      | 0.07                                                   | 21.3                                                                        | 762.8                                     |
| TiO <sub>2</sub> /Pt/10TiO <sub>2</sub> /Ni/TiO <sub>2</sub>  | 1.41                   | 0.40 | 35.3                                                   | 3.7                      | 0.06                                                   | 21.2                                                                        | 1168.6                                    |
| TiO <sub>2</sub> /Pt/30TiO <sub>2</sub> /Ni/TiO <sub>2</sub>  | 1.39                   | 0.40 | 36.3                                                   | 3.6                      | 0.07                                                   | 22.3                                                                        | 798.4                                     |
| TiO <sub>2</sub> /Pt/50TiO <sub>2</sub> /Ni/TiO <sub>2</sub>  | 1.40                   | 0.39 | 33.6                                                   | 3.6                      | 0.07                                                   | 20.4                                                                        | 628.1                                     |
| TiO <sub>2</sub> /Pt/100TiO <sub>2</sub> /Ni/TiO <sub>2</sub> | 1.39                   | 0.40 | 35.2                                                   | 3.6                      | 0.09                                                   | 20.1                                                                        | 486.0                                     |
| TiO <sub>2</sub> /Pt/TiO <sub>2</sub>                         | -                      | 0.41 | 35.0                                                   | 3.6                      | 0.07                                                   | 16.5                                                                        | 147.7                                     |
| TiO <sub>2</sub> /Ni/TiO <sub>2</sub>                         | 1.40                   | -    | 35.1                                                   | 3.6                      | 0.08                                                   | 15.3                                                                        | 165.7                                     |

[a] Determined by ICP-OES.

[b] The surface areas and volumes were determined by the BET method.

[c] The H<sub>2</sub> uptake was tested by hydrogen-pulse adsorption at 30°C.

[d] Turnover frequency (TOF) is calculated basing the H<sub>2</sub> uptake and the reaction rate.

**Supplemental Table 2.** Summary of EXAFS fitting parameters of Ni for different catalysts.

| Sample                                                        | Scatterer | N         | R(Å)        | $\sigma^2 \times 10^{-3}(\text{Å}^2)$ | $\Delta E_0$ (eV) | Ratio(%) |
|---------------------------------------------------------------|-----------|-----------|-------------|---------------------------------------|-------------------|----------|
| TiO <sub>2</sub> /Pt/100TiO <sub>2</sub> /Ni/TiO <sub>2</sub> | Ni-Ni     | 5.56±0.78 | 2.49±0.001  | 6.45±1.36                             | -4.80±1.36        | 73.4     |
|                                                               | Ni-O      | 1.58±0.48 | 1.97±0.026  | 3.81±5.47                             | -4.80±1.37        | 26.6     |
| TiO <sub>2</sub> /Pt/50TiO <sub>2</sub> /Ni/TiO <sub>2</sub>  | Ni-Ni     | 5.24±0.82 | 2.49±0.0014 | 6.04±1.47                             | -5.09±1.56        | 73.0     |
|                                                               | Ni-O      | 1.66±0.57 | 1.86±0.038  | 4.74±6.42                             | -5.09±1.57        | 27.0     |
| TiO <sub>2</sub> /Pt/10TiO <sub>2</sub> /Ni/TiO <sub>2</sub>  | Ni-Ni     | 4.08±1.04 | 2.52±0.029  | 6.24±2.55                             | -2.68±1.65        | 57.8     |
|                                                               | Ni-O      | 2.13±0.46 | 2.02±0.026  | 0.39±3.52                             | -2.68±1.66        | 42.2     |
| TiO <sub>2</sub> /Pt/Ni/TiO <sub>2</sub>                      | Ni-Ni     | 4.95±1.75 | 2.52±0.033  | 6.30±4.20                             | -1.58±2.47        | 52.3     |
|                                                               | Ni-O      | 1.99±0.67 | 2.03±0.037  | 0.38±5.42                             | -1.58±2.48        | 31.5     |
|                                                               | Ni-Pt     | 0.23±1.57 | 2.13±0.13   | 3.49±27.5                             | -1.58±2.49        | 16.2     |
| TiO <sub>2</sub> /Ni/TiO <sub>2</sub>                         | Ni-Ni     | 8.13±0.78 | 2.48±0.006  | 6.35±0.91                             | -7.02±0.99        | 85.0     |
|                                                               | Ni-O      | 1.23±0.54 | 1.98±0.018  | 4.42±0.80                             | -7.02±0.10        | 15.0     |
| Ni Foil                                                       | Ni-Ni     | 12        | 2.479±0.012 | 5.77±0.32                             | 6.20±0.35         | 100.0    |

**Supplemental Table 3.** Summary of EXAFS fitting parameters of Pt for different catalysts.

| Sample                                                        | Scatterer | N         | R(Å)       | $\sigma^2 \times 10^{-3}(\text{Å}^2)$ | $\Delta E_0$ (eV) | Ratio (%) |
|---------------------------------------------------------------|-----------|-----------|------------|---------------------------------------|-------------------|-----------|
| TiO <sub>2</sub> /Pt/100TiO <sub>2</sub> /Ni/TiO <sub>2</sub> | Pt-Pt     | 3.13±1.49 | 2.71±0.078 | 3.23±2.17                             | 2.12±1.27         | 46.2      |
|                                                               | Pt-Ti     | 2.27±0.45 | 2.59±0.003 | 0.93±1.21                             | 2.12±1.28         | 53.8      |
| TiO <sub>2</sub> /Pt/50TiO <sub>2</sub> /Ni/TiO <sub>2</sub>  | Pt-Pt     | 2.96±1.97 | 2.67±0.11  | 3.10±3.03                             | 1.89±1.64         | 44.0      |
|                                                               | Pt-Ti     | 2.37±0.60 | 2.59±0.009 | 0.74±1.56                             | 1.89±1.65         | 56.0      |
| TiO <sub>2</sub> /Pt/30TiO <sub>2</sub> /Ni/TiO <sub>2</sub>  | Pt-Pt     | 3.09±2.17 | 2.67±0.11  | 2.37±3.09                             | 2.44±1.51         | 41.5      |
|                                                               | Pt-Ti     | 2.95±0.67 | 2.59±0.005 | 0.13±1.37                             | 2.44±1.52         | 58.5      |
| TiO <sub>2</sub> /Pt/10TiO <sub>2</sub> /Ni/TiO <sub>2</sub>  | Pt-Pt     | 2.73±1.91 | 2.67±0.11  | 1.70±0.30                             | 2.62±1.38         | 41.3      |
|                                                               | Pt-Ti     | 3.04±0.62 | 2.59±0.006 | 0.00±1.25                             | 2.62±1.39         | 58.7      |
| TiO <sub>2</sub> /Pt/Ni/TiO <sub>2</sub>                      | Pt-Ni     | 9.24±1.32 | 2.54±0.05  | 5.24±1.53                             | 4.06±1.39         | 89.0      |
|                                                               | Pt-Ti     | 0.69±0.68 | 2.67±0.006 | 0.00±6.28                             | 4.06±1.40         | 11.0      |
| TiO <sub>2</sub> /Pt/TiO <sub>2</sub>                         | Pt-Pt     | 4.63±1.05 | 2.67±0.11  | 6.02±1.14                             | 3.87±1.01         | 69.1      |
|                                                               | Pt-Ti     | 1.36±0.40 | 2.59±0.006 | 6.29±2.23                             | 3.87±1.02         | 30.9      |
| Pt Foil                                                       | Pt-Pt     | 12        | 2.76±0.011 | 4.56±0.28                             | 6.99±0.035        | 100.0     |

**Supplemental Table 4.** Assignments of fragment peaks in Supplemental Figure 7 and 8.

| m/z | Formula                                       | Standard aniline | Aniline in D <sub>2</sub> O |
|-----|-----------------------------------------------|------------------|-----------------------------|
| 93  | C <sub>6</sub> H <sub>5</sub> NH <sub>2</sub> | 999 (93.1%)      | 53 (17.2%)                  |
| 94  | C <sub>6</sub> H <sub>5</sub> NDH             | 72 (6.7%)        | 129 (41.8%)                 |
| 95  | C <sub>6</sub> H <sub>5</sub> ND <sub>2</sub> | 2 (0.2%)         | 126 (41.0%)                 |
